# Supplementary material for: Molecular Genetic Characterization of Individual Cancer Cells Isolated via Single-Cell Printing
Source: PLOS journal article supplement (doi:10.1371/journal.pone.0163455), 2016-09-22
Supplement: S3 (10.1371/journal.pone.0163455.s003) [file journal.pone.0163455.s003]

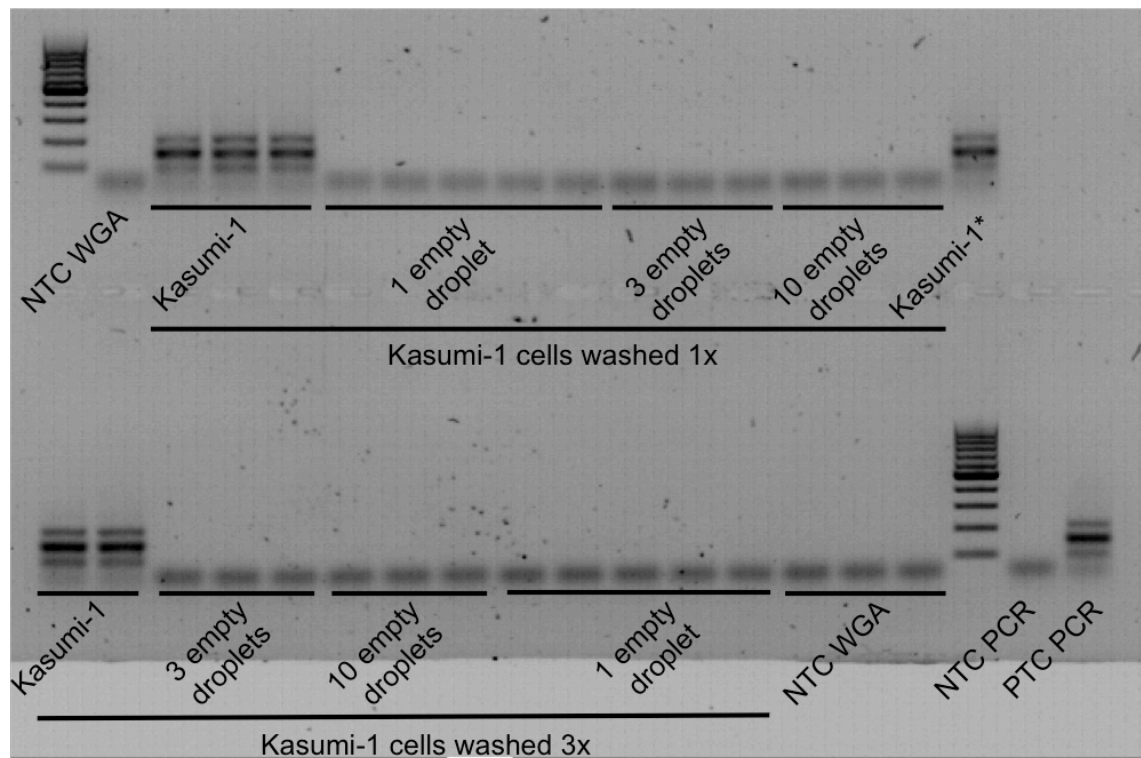

**S3 Fig. Whole genome amplification and PCR on empty droplets**

Multiplex PCR on *LINE1* retrotransposons after whole genome amplification (WGA) was performed on single Kasumi-1 cells and empty droplets. Kasumi-1 cells were either washed once or three times before they were filled into the Single-Cell Printer (SCP) cartridge; then, either Kasumi-1 cells or one, three or ten empty droplets were deposited into each well of a 384-microwell plate and subjected to cell lysis, WGA and *LINE1* PCR. \* Kasumi-1 cells washed three times. NTC, no-template control; PTC, positive control
