# Supplementary material for: Molecular Genetic Characterization of Individual Cancer Cells Isolated via Single-Cell Printing
Source: PLOS journal article supplement (doi:10.1371/journal.pone.0163455), 2016-09-22
Supplement: S4 (10.1371/journal.pone.0163455.s004) [file journal.pone.0163455.s004]

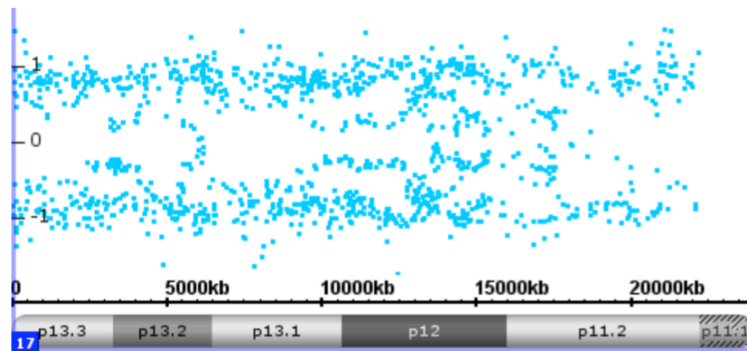

**S4 Fig. Allele peak plot of chromosome arm 17p in the AML patient**

Allele peak plot of chromosome arm 17p as assessed by CytoScan HD array in a peripheral blood sample of the patient AML. A homozygous AA genotype maps to approximately +1, a homozygous BB to approximately -1, a heterozygous AB to approximately 0 and a single A or B allele to 0.5 and -0.5, respectively. The allele peak plot indicates the loss of the chromosome 17p region in a subset of cells.
